# Supplementary material for: A process based method to estimate the hydrograph from small agricultural watersheds
Source: PLOS journal article supplement (doi:10.1371/journal.pgen.1001154), 1990-01-01

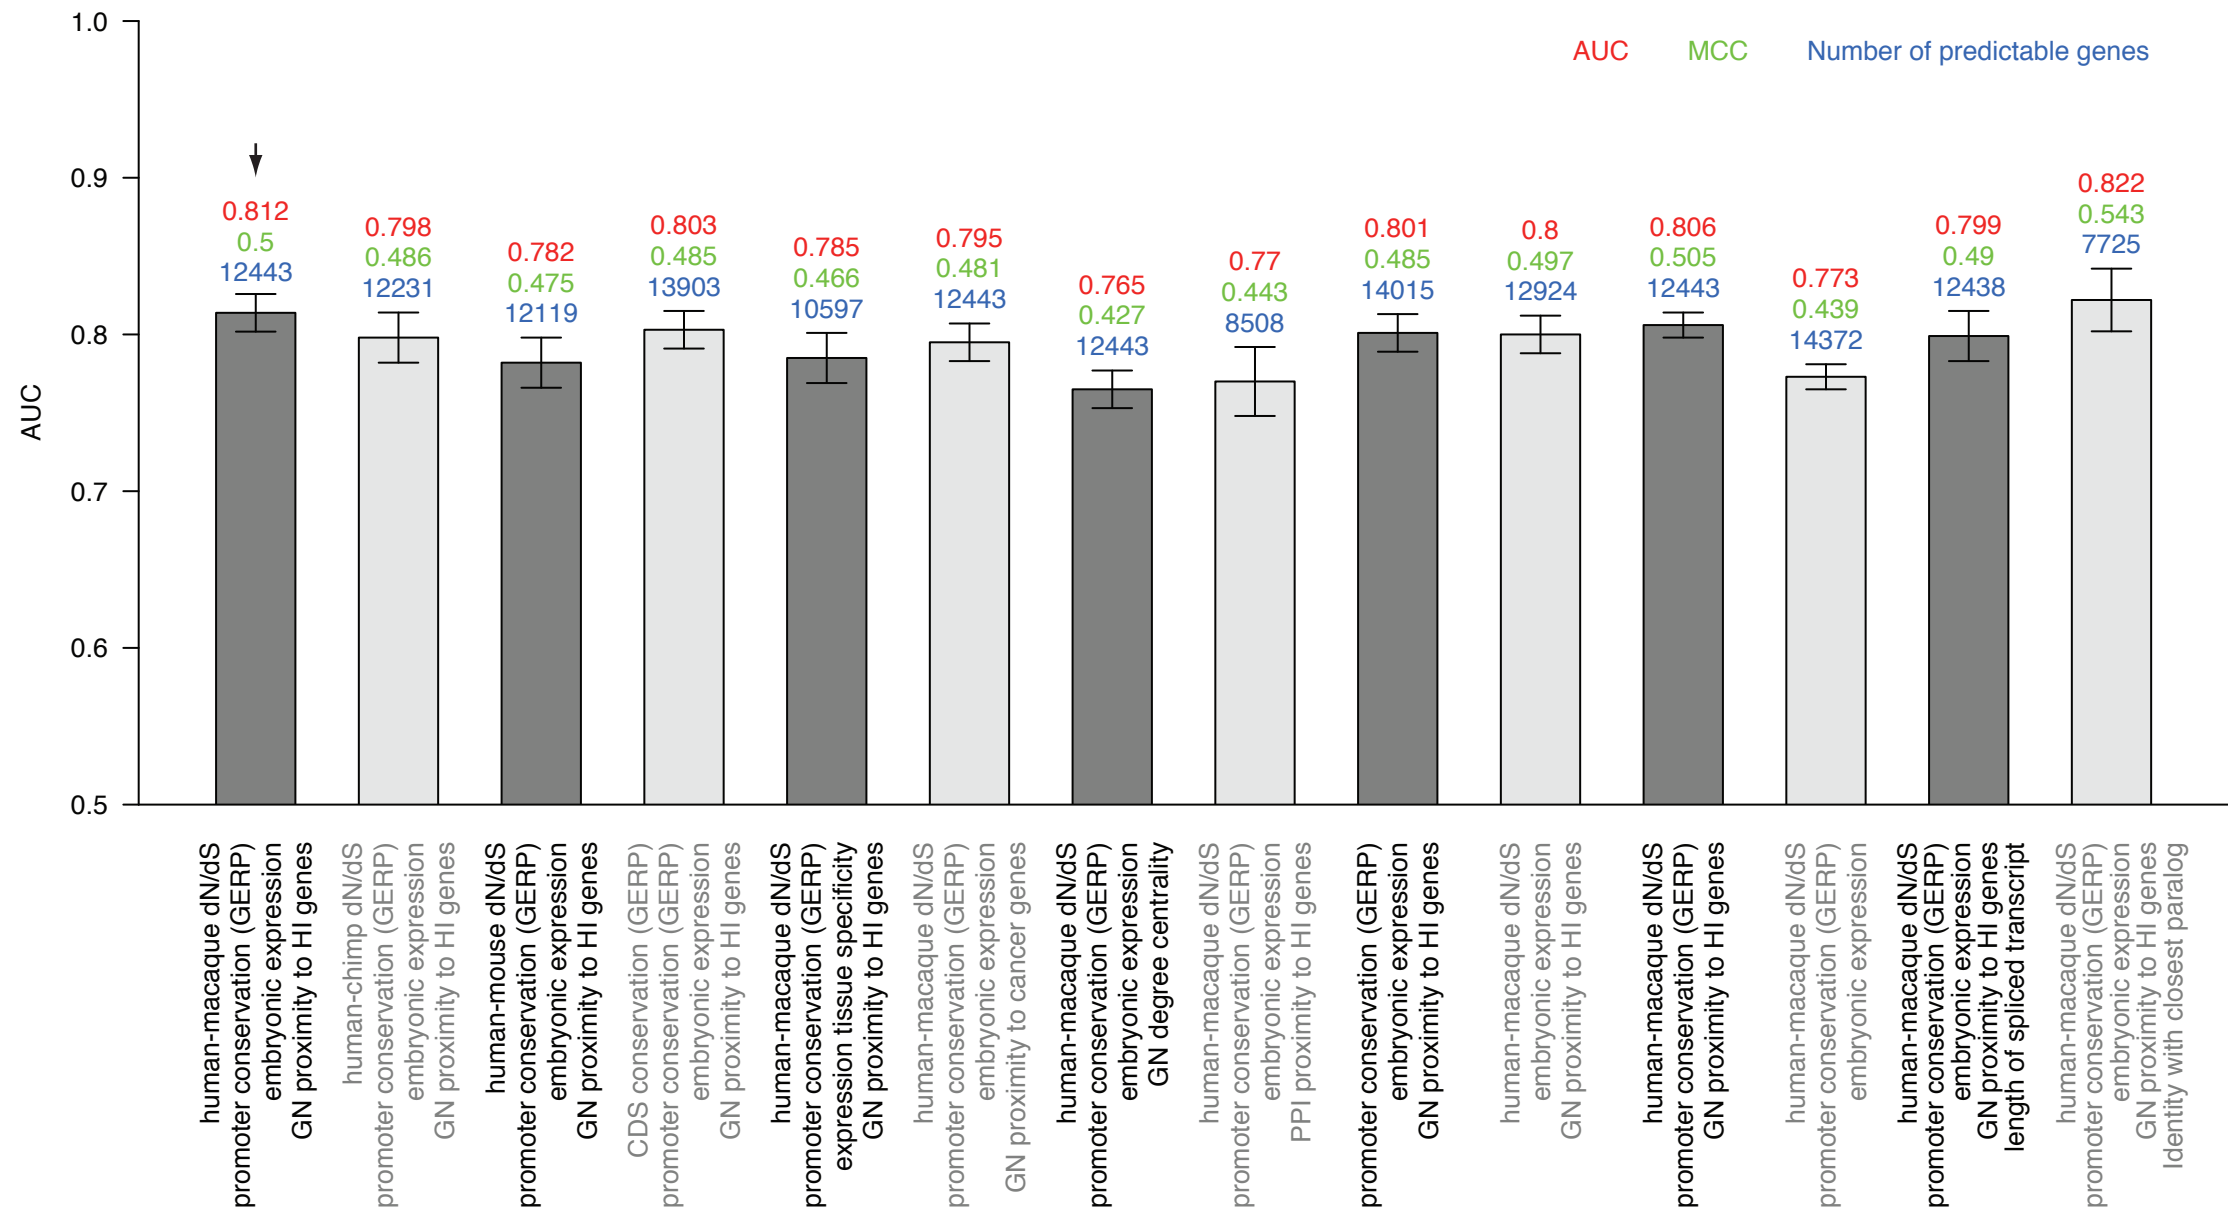

Supplement: S5 (10.1371/journal.pgen.1001154.s005) [file journal.pgen.1001154.s005]
