# Supplementary material for: A process based method to estimate the hydrograph from small agricultural watersheds
Source: PLOS journal article supplement (doi:10.1371/journal.pgen.1001154), 1990-01-01
Supplement: S17 (10.1371/journal.pgen.1001154.s017) [file journal.pgen.1001154.s017]

**Table S2: Genomic coverage of gene properties**

| Property                                | Number of genes | Genomic coverage* |
|-----------------------------------------|-----------------|-------------------|
| <i>dN/dS</i> human-chimp                | 15,084          | 79.5%             |
| <i>dN/dS</i> human-macaque              | 15,025          | 79.2%             |
| <i>dN/dS</i> human-mouse                | 14,386          | 75.8%             |
| Coding sequence GERP                    | 17,164          | 90.5%             |
| Promoter GERP                           | 16,807          | 88.7%             |
| Number of paralogs                      | 11,066          | 58.3%             |
| Identity of closest paralogs            |                 |                   |
| Number of exons                         |                 |                   |
| Length of gene                          |                 |                   |
| Length of spliced transcript            | 17,700          | 93.3%             |
| Length of coding sequence               |                 |                   |
| Length of 3'UTR                         |                 |                   |
| Number of domains                       | 14,722          | 88.5%             |
| Embryonic expression <sup>†</sup>       | 14,722 (2,421)  | 88.5% (12.8%)     |
| Tissue specificity of expression        | 13,950          | 73.6%             |
| PPI network properties <sup>‡</sup>     | 11,077          | 58.4%             |
| Genetic network properties <sup>‡</sup> | 14,664          | 77.3%             |
| +/- yeast growth rate                   | 3,352           | 17.7%             |

\* Calculated relative to the number of Ensembl annotated protein-coding genes that can be uniquely mapped to HGNC symbol.

<sup>†</sup> Since this is a binary factor where every gene is classified as either over-expressed or not in embryo tissue, the coverage is 100%. The number and proportion of genes over-expressed in embryo is listed in parenthesis.

<sup>‡</sup> Including degree, cluster coefficient, betweenness, distance to known HI genes/cancer genes, proximity to known HI/cancer genes.
