# Supplementary material for: A process based method to estimate the hydrograph from small agricultural watersheds
Source: PLOS journal article supplement (doi:10.1371/journal.pgen.1001154), 1990-01-01
Supplement: S19 (10.1371/journal.pgen.1001154.s019) [file journal.pgen.1001154.s019]

**Table S4: Comparison of LOF deletions between European and African Americans**

| Population        | Average number of LOF CNVs per individual | Average number of predictable LOF genes per individual | Average number of LOF genes in most pathogenic CNV per individual* | Average $LOD_{max}$ per individual | Proportion of population with $LOD_{max}$ in the top 1% of the pooled population |
|-------------------|-------------------------------------------|--------------------------------------------------------|--------------------------------------------------------------------|------------------------------------|----------------------------------------------------------------------------------|
| African American  | 7.35                                      | 10.1                                                   | 2.74                                                               | -0.38                              | 0.79%                                                                            |
| European American | 7.41                                      | 10.5                                                   | 2.85                                                               | -0.36                              | 1.18%                                                                            |

\* Most pathogenic defined as having the highest LOD score in the individual ( $LOD_{max}$ ).
